# Supplementary material for: MALT1 Proteolytic Activity Suppresses Autoimmunity in a T Cell Intrinsic Manner
Source: PubMed Central journal article supplement (PMC6702287; doi:10.3389/fimmu.2019.01898), 2019-08-14
Supplement: Image_1.pdf [file Image_1.pdf]

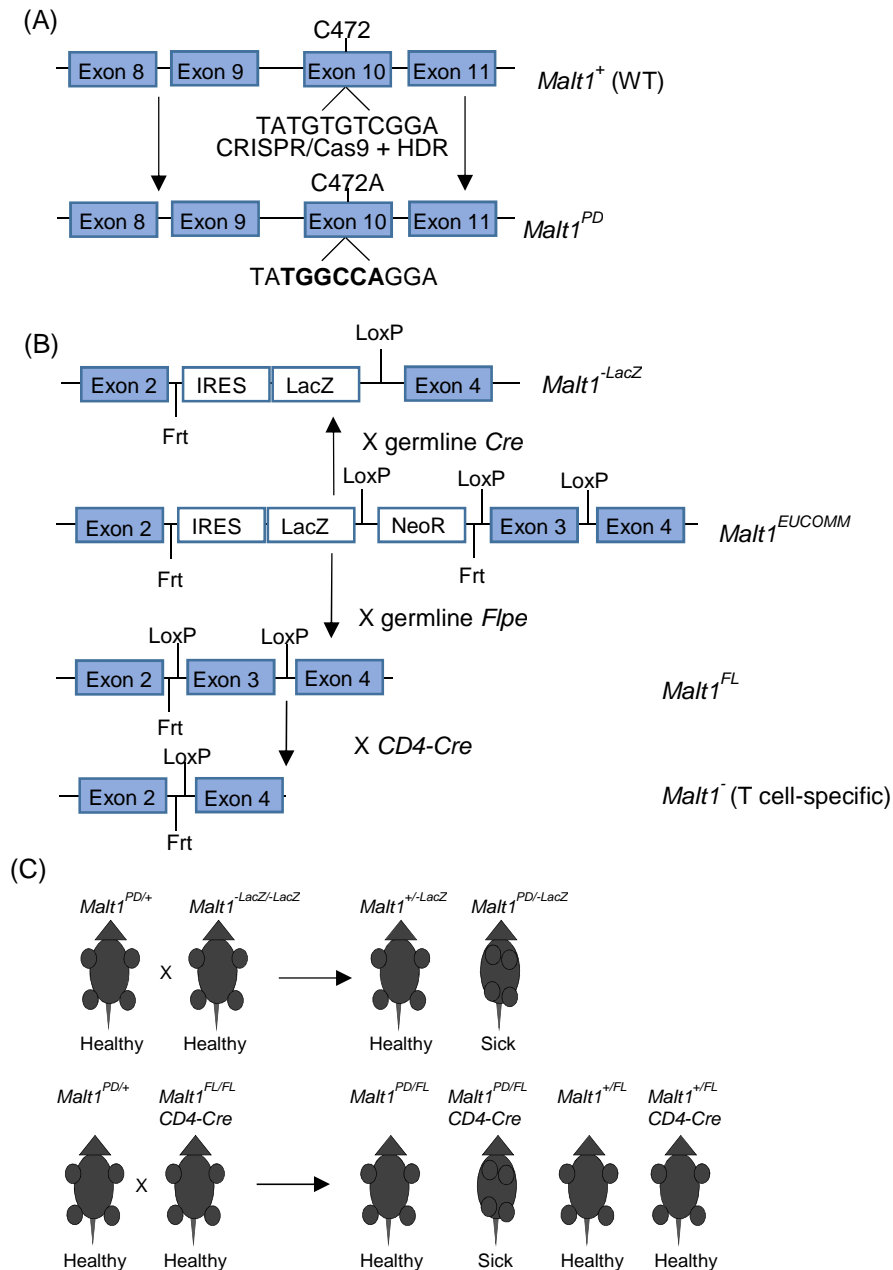

### Supplementary Figure 1: Overview of the strategy used to generate different mouse lines

(A) Generation of the *MALT1*-PD mice carrying a C472A mutation in exon 10 (ENSMUSE00000318133) by CRISPR/Cas9 and homology directed repair. The mutation introduces a silent MscI (TGG|CCA) restriction site. (B) Generation of *Malt1*<sup>-LacZ</sup> mice from the original EUCOMM insert. The neomycin resistance cassette and exon 3 are removed by germline *Cre* recombinase expression, but the *E. coli* galactosidase (LacZ) reporter is maintained. Generation of conditional *Malt1*<sup>FL/FL</sup> KO mice from the original EUCOMM insert. The LacZ reporter and the neomycin resistance cassette is removed by germline *F/pe* recombinase expression, leaving exon 3 (ENSMUSE00000318222) flanked by loxP sites. Upon Cre recombinase expression (either germ-line or cell-specific), the 122 bp exon 3 is deleted causing a -1 frame shift and KO of *Malt1*. (C) Healthy *Malt1*<sup>PD/+</sup> mice are crossed with either full *Malt1*-KO (*Malt1*<sup>-LacZ/-LacZ</sup>) mice, which causes a 1:1 ratio of healthy and sick offspring, or with T cell-specific *Malt1*-KO (*Malt1*<sup>FL/FL CD4-Cre</sup>) mice, which causes a 3:1 ratio of healthy vs sick offspring.

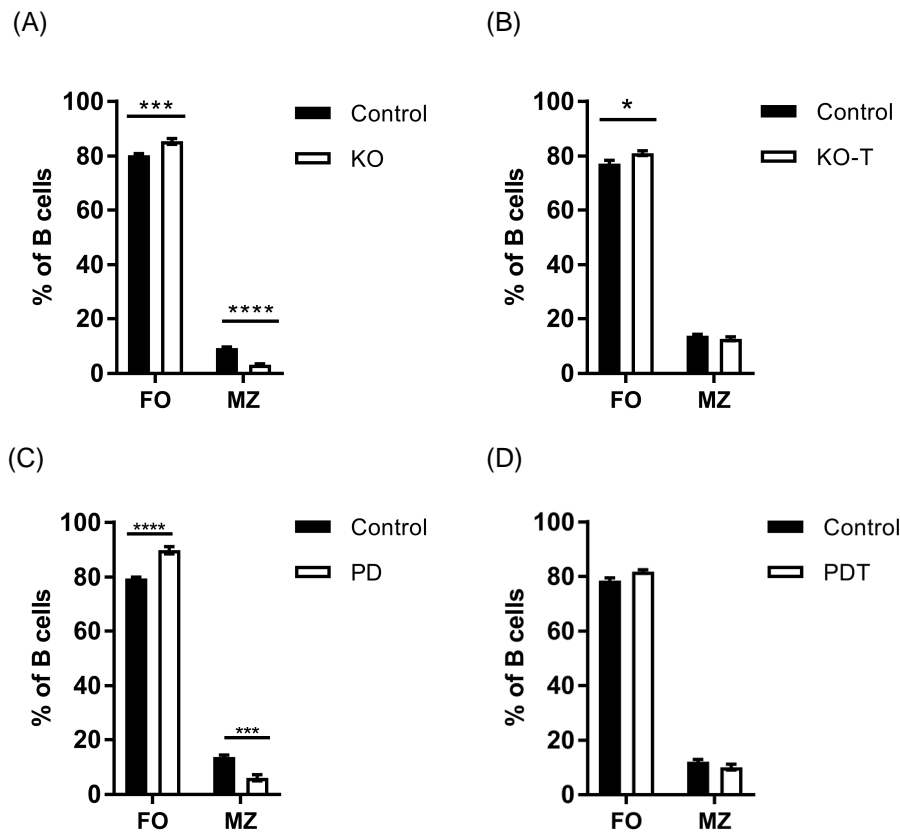

**Supplementary Figure 2: MZ B cells are reduced in *Malt1*-KO and *Malt1*-PD mice but not in T cell-specific *Malt1*-KO and *Malt1*-PDT mice**

(A-D) Frequency of MZ B cells (% CD21<sup>+</sup>CD23<sup>-</sup> of B220<sup>+</sup> B cells) and follicular (FO) B cells (% CD21<sup>+</sup>CD23<sup>+</sup> of B220<sup>+</sup> B cells) in the spleen of *Malt1*-KO (A), *Malt1*<sup>FL/FL</sup> *CD4-Cre* (KO-T) (B), *Malt1*-PD (C) and *Malt1*-PDT mice (D) that suffer from ataxia, and corresponding control mice. Data information: All data were obtained via flow cytometry. (A) *Malt1*-KO mice n = 5 and corresponding control mice n = 4. (B) *Malt1*<sup>FL/FL</sup> *CD4-Cre* (KO-T) mice n = 5 and corresponding control mice n = 3. (C) *Malt1*-PD mice n = 4 and corresponding control mice n = 6. (D) *Malt1*-PDT mice n = 3 and corresponding control mice n = 6. The mean +/- SEM is indicated on the graphs. The statistical significance between groups was calculated with an unpaired 2 tailed Student's *t*-test: \* P < 0,05, \*\*P < 0.01, \*\*\* p < 0,001 and \*\*\*\* p < 0.0001.

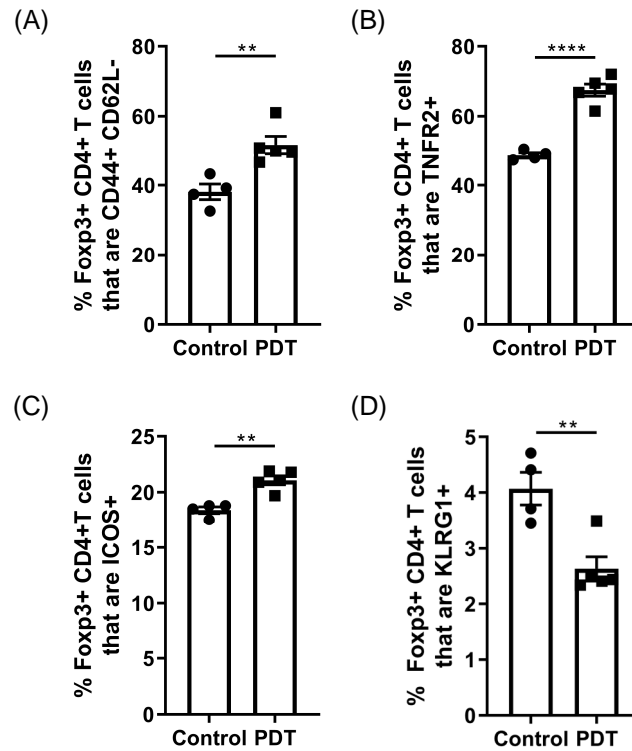

**Supplementary Figure 3: *Malt1*-PDT mice do not have a generalized defect in Treg effector markers**

(A) Frequency of effector Tregs (% CD44<sup>+</sup>CD62L<sup>-</sup> of Fosp3<sup>+</sup>CD4<sup>+</sup> T cells) and (B-D) frequency of Tregs expressing TNFR2, ICOS or KLRG1 on their surface in cLN of 3-4 week old *Malt1*-PDT (n = 5) and corresponding control mice (n = 4). All data were obtained via flow cytometry. The mean +/- SEM is indicated on the graphs. The statistical significance between groups was calculated with an unpaired 2 tailed Student's t-test: \*\* p < 0.01 and \*\*\*\* p < 0.0001.

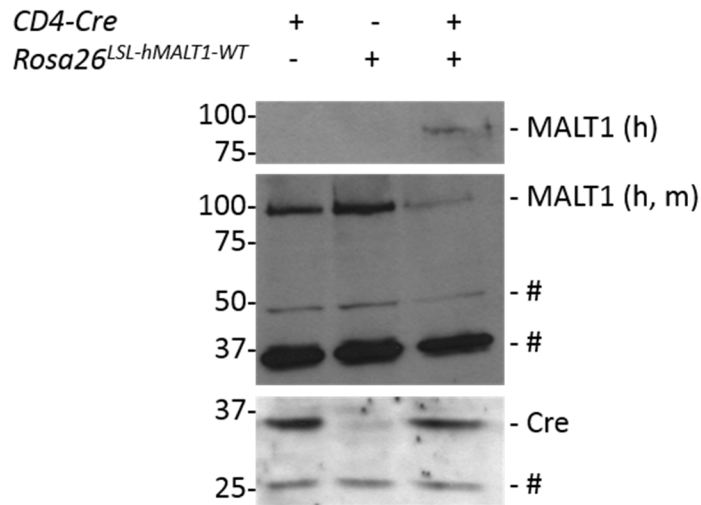

**Supplementary Figure 4: Western blot showing *CD4-Cre*-inducible hMALT1 transgene expression**

Splenocytes from *Malt1<sup>PD/-</sup> CD4-Cre*, *Malt1<sup>PD/-</sup> Rosa26<sup>LSL-hMALT1-WT</sup>* and *Malt1<sup>PD/-</sup> CD4-Cre Rosa26<sup>LSL-hMALT1-WT</sup>* mice were lysed in E1A buffer and equal amounts of protein (100µg) were run on SDS-PAGE and blotted. The western blot was developed with a human-specific anti-MALT1 antibody (top panel), a human/mouse specific anti-MALT1 antibody (middle panel), and an anti-Cre recombinase antibody (lower panel). Aspecific bands (#) are used as loading control.
